# Supplementary material for: COVID-19 and Cancer Diseases—The Potential of Coriolus versicolor Mushroom to Combat Global Health Challenges
Source: MDPI journal article supplement (doi:10.3390/ijms24054864), 2023-03-02
Supplement: s1 [file s1]

# COVID-19 and cancer diseases – the potential of *Coriolus versicolor* mushroom to combat global health challenges

Supplementary materials – Chemical structures of the main active CV compounds.

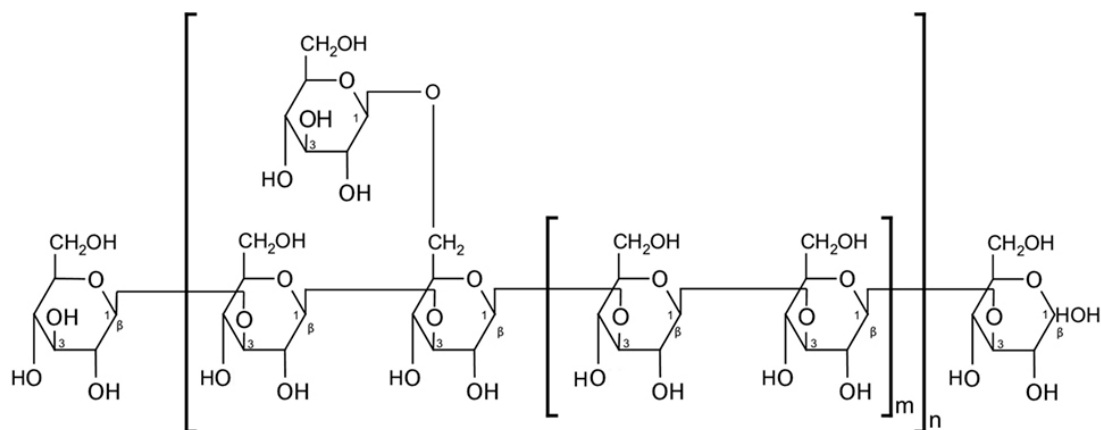

Figure S1. Polysaccharopeptide (PSP). Figure replicated from Wan et al. (24).

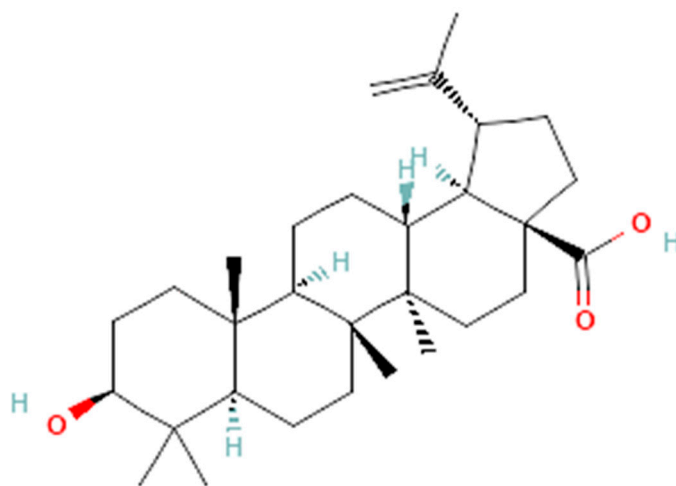

Figure S2. Betulinic acid. Figure replicated from (25).

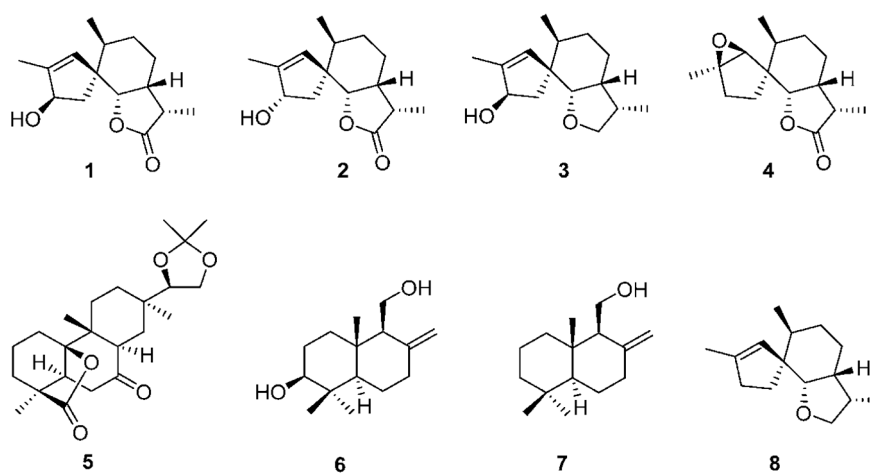

**Figure S3.** Terpenoids: Tramspiroids A–D (1–4), rosenonolactone 15,16-acetonide (5), and the drimane sesquiterpenes isodrimenediol (6) and funatrol D (7). Figures replicated from Habtemariam (26).

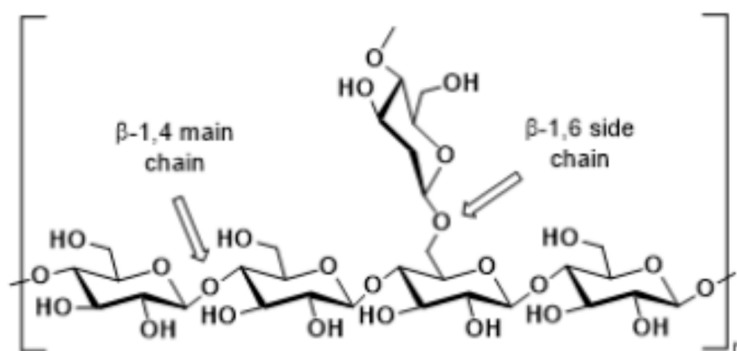

**Figure S4.** Polysaccharide krestin (PSK). Figure replicated from Sivanesan et al. (27).

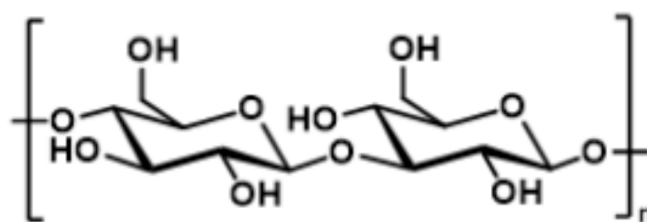

**Figure S5.**  $\beta$ -1-3-D glucan (backbone). Figure replicated from Sivanesan et al. (27).
